# Supplementary material for: Strand-specific RNA sequencing in Plasmodium falciparum malaria identifies developmentally regulated long non-coding RNA and circular RNA
Source: PubMed Central journal article supplement (PMC4465157; doi:10.1186/s12864-015-1603-4), 2015-06-13
Supplement: 12864_2015_1603_MOESM1_ESM.pdf [file 12864_2015_1603_MOESM1_ESM.pdf]

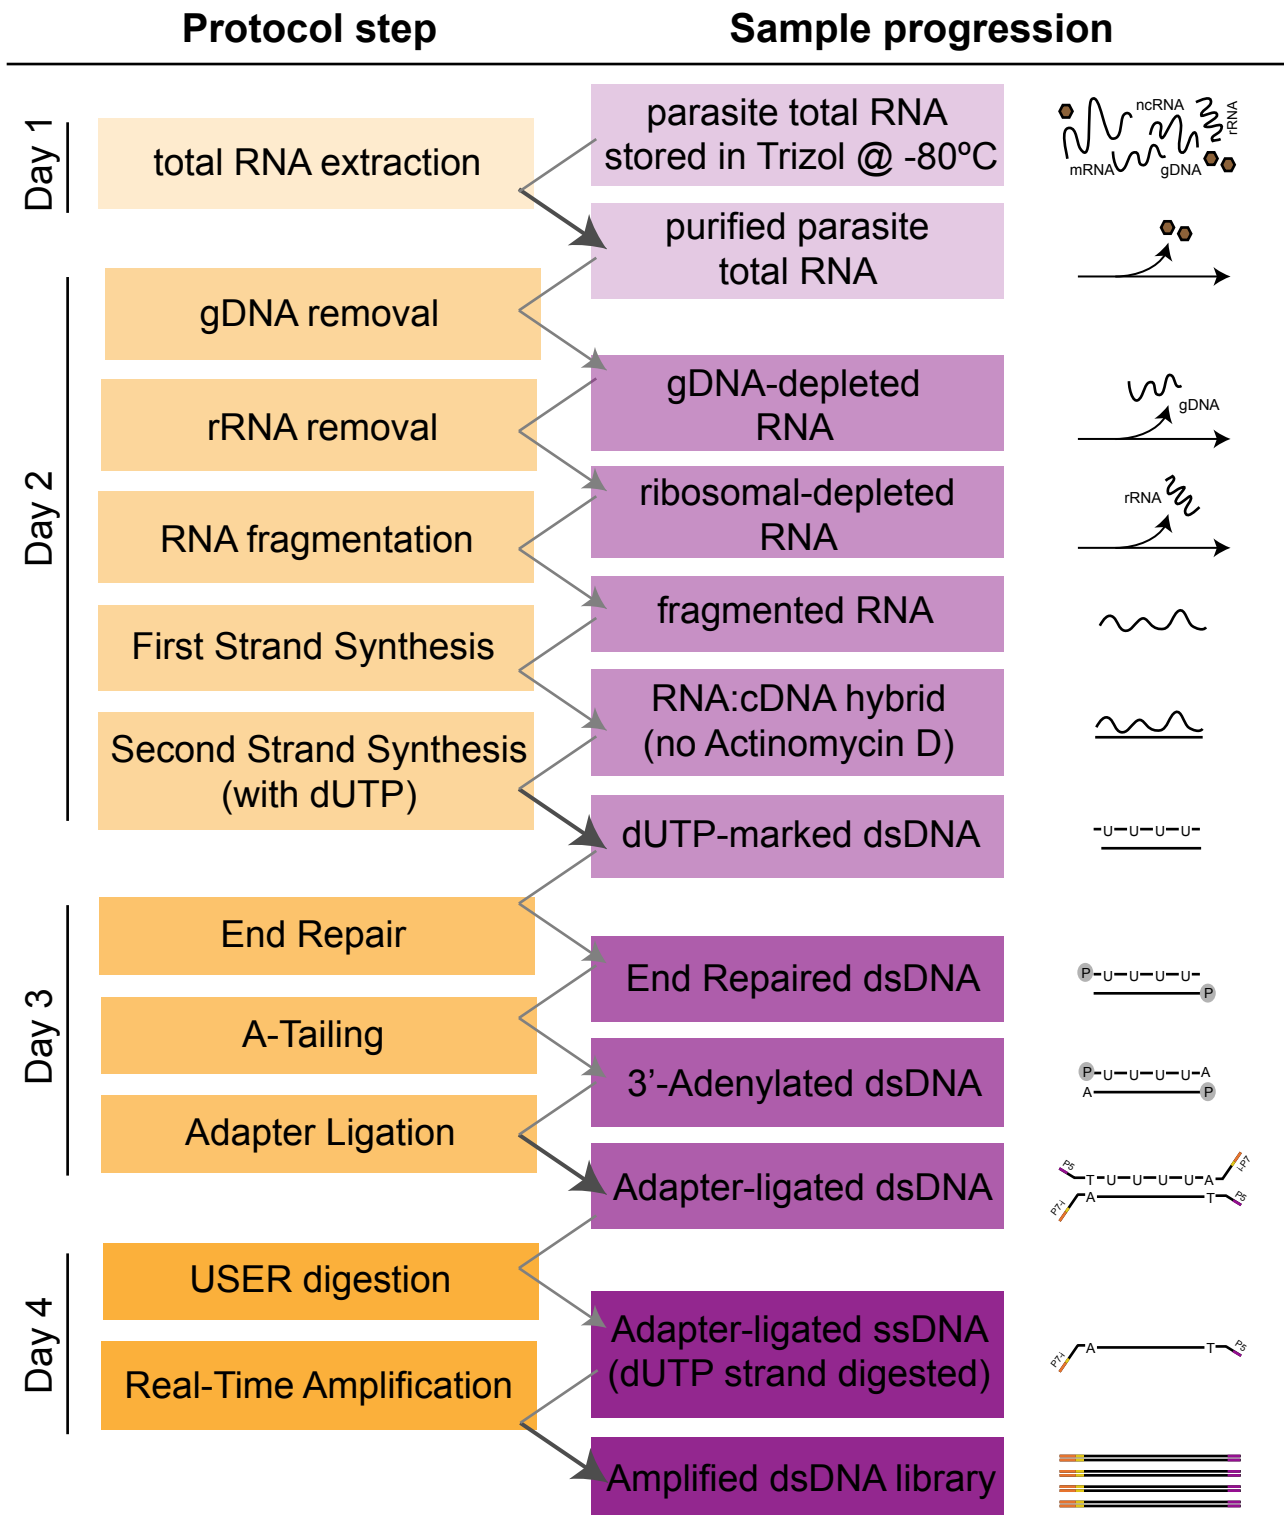

**Figure S1. Strand-specific, non-polyA-selected *P. falciparum* libraries can be comfortably prepared in one week.** The flowchart shows major protocol steps and sample progression during library preparation, beginning with parasite total RNA stored in TRIZOL Reagent and ending with amplified double-stranded DNA libraries ready for quantification and Illumina sequencing.
