# Supplementary material for: Strand-specific RNA sequencing in Plasmodium falciparum malaria identifies developmentally regulated long non-coding RNA and circular RNA
Source: PubMed Central journal article supplement (PMC4465157; doi:10.1186/s12864-015-1603-4), 2015-06-13
Supplement: 12864_2015_1603_MOESM24_ESM.pdf [file 12864_2015_1603_MOESM24_ESM.pdf]

## Var family expression by upstream promoter classification

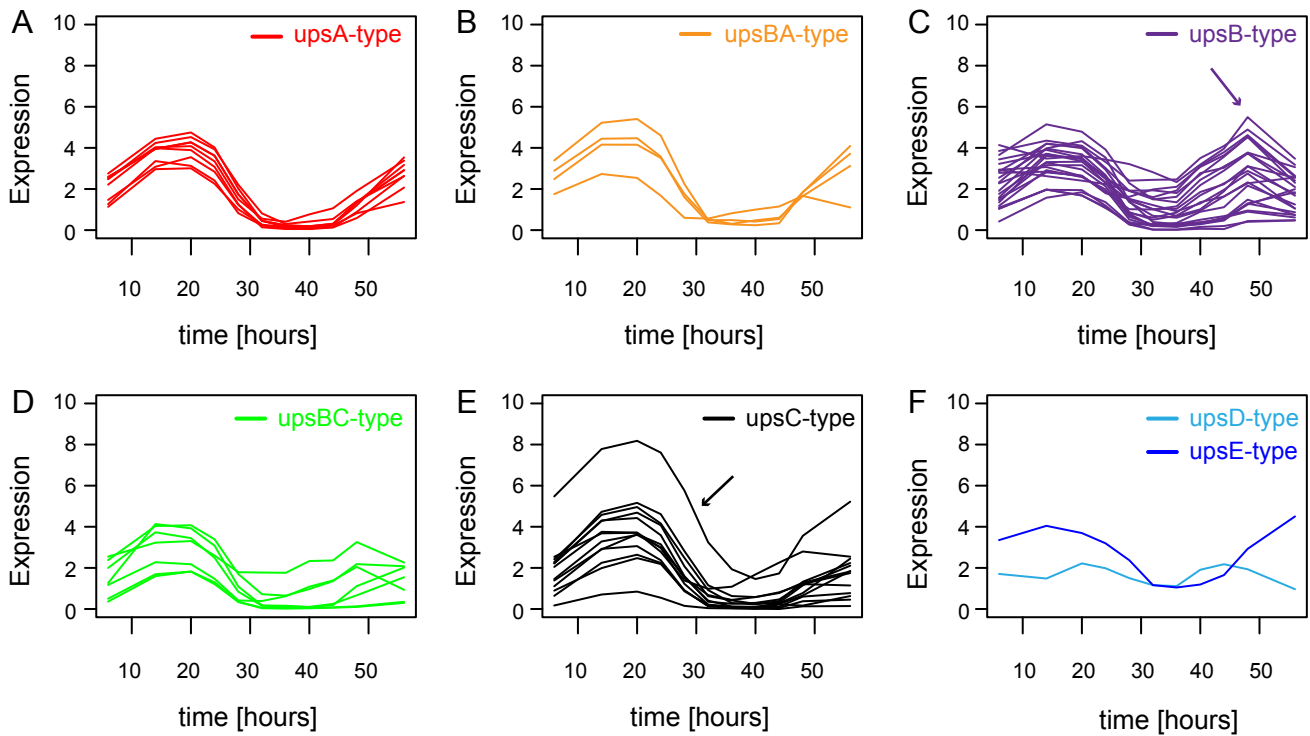

**Figure S24. A central upsC-type var gene is the dominant var transcript, and subtelomeric upsB-type var genes produce the most non-coding transcripts.** (A/B/C/D/E/F) Expression during the 56-hour time course of upsA-type (red), upsBA-type (orange), upsB-type (purple), upsBC-type (green), upsC-type (black), upsD-type (light blue) and upsE-type (dark blue) var genes, respectively [1]. This analysis indicated that an upsC-type gene, *Pf3D7\_0412700*, was the dominant var transcript in the parasite population (black arrow). We also noted that the transcription of non-coding transcripts varied by upstream promoter (ups) type. Interestingly, the majority of upsB-type var genes transcribed non-coding transcripts during parasite invasion (purple arrow), whereas the majority of upsA-type and upsC-type var genes did not. Expression is plotted in units of  $\log_2(\text{FPKM}+1)$ .

upsA-type: *Pf3D7\_0425800*, *Pf3D7\_1150400*, *Pf3D7\_1300300*, *Pf3D7\_0800200*, *Pf3D7\_1100200*, *Pf3D7\_0400400*, *Pf3D7\_0100300*, *Pf3D7\_0937600*, *Pf3D7\_0600400*; upsBA-type: *Pf3D7\_0800300*, *Pf3D7\_1200400*, *Pf3D7\_0600200*, *Pf3D7\_0632500*; upsB-type: *Pf3D7\_1100100*, *Pf3D7\_0800100*, *Pf3D7\_0500100*, *Pf3D7\_0100100*, *Pf3D7\_0115700*, *Pf3D7\_0324900*, *Pf3D7\_0400100*, *Pf3D7\_0900100*, *Pf3D7\_0223500*, *Pf3D7\_1041300*, *Pf3D7\_1200100*, *Pf3D7\_0200100*, *Pf3D7\_0300100*, *Pf3D7\_1255200*, *Pf3D7\_0426000*, *Pf3D7\_0937800*, *Pf3D7\_1000100*, *Pf3D7\_1219300*, *Pf3D7\_0632800*, *Pf3D7\_1373500*, *Pf3D7\_0733000*, *Pf3D7\_0700100*, *Pf3D7\_1300100*, *Pf3D7\_0833500*; upsBC-type: *Pf3D7\_0413100*, *Pf3D7\_1240400*, *Pf3D7\_0808700*, *Pf3D7\_0712800*, *Pf3D7\_0712400*, *Pf3D7\_0421100*, *Pf3D7\_1240300*; upsC-type: *Pf3D7\_0712900*, *Pf3D7\_0808600*, *Pf3D7\_0420700*, *Pf3D7\_0712000*, *Pf3D7\_0412900*, *Pf3D7\_0420900*, *Pf3D7\_0421300*, *Pf3D7\_0412400*, *Pf3D7\_0712600*, *Pf3D7\_0711700*, *Pf3D7\_1240600*, *Pf3D7\_0412700*, *Pf3D7\_0617400*; upsD-type: *Pf3D7\_0533100*; upsE-type: *Pf3D7\_1200600*.

1. Lavstsen T, Salanti A, Jensen AT, Arnot DE, Theander TG (2003) Sub-grouping of *Plasmodium falciparum* 3D7 var genes based on sequence analysis of coding and non-coding regions. *Malaria Journal* 2: 27.
