# Supplementary material for: Strand-specific RNA sequencing in Plasmodium falciparum malaria identifies developmentally regulated long non-coding RNA and circular RNA
Source: PubMed Central journal article supplement (PMC4465157; doi:10.1186/s12864-015-1603-4), 2015-06-13
Supplement: 12864_2015_1603_MOESM26_ESM.pdf [file 12864_2015_1603_MOESM26_ESM.pdf]

A Apicoplast RNA methyltransferase precursor [Pf3D7\_0218300] antisense transcript

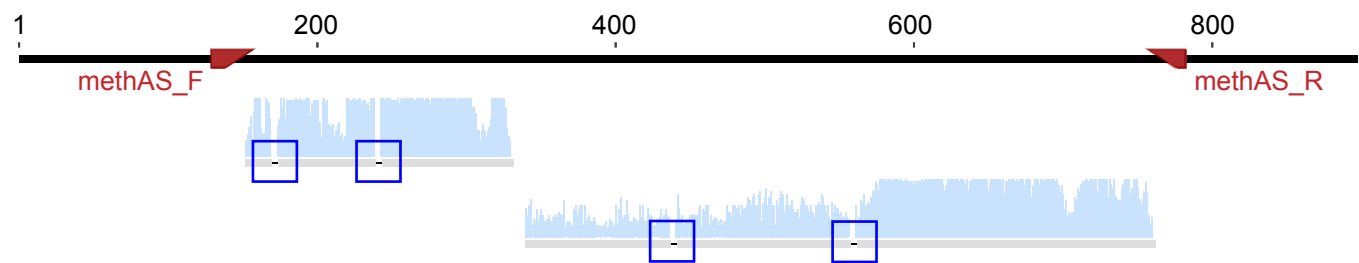

B ETRAMP [Pf3D7\_0936100] antisense transcript

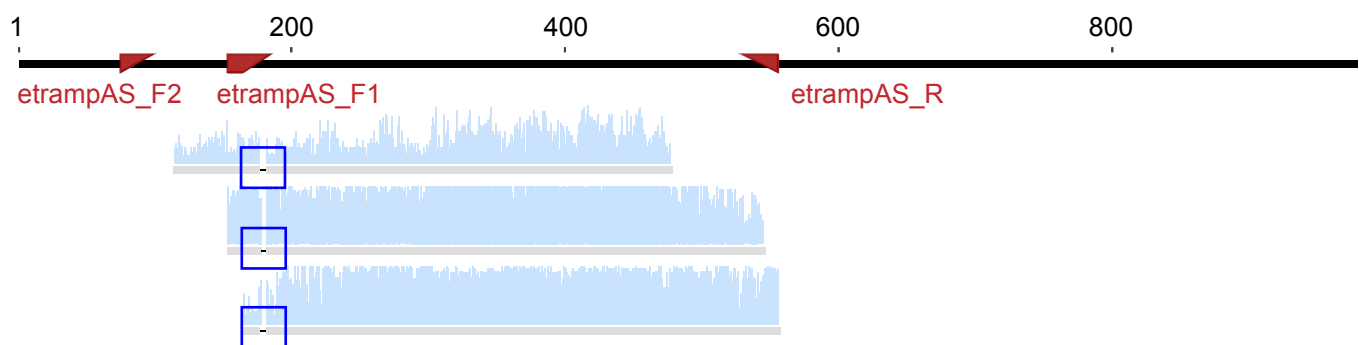

C PfGDV1 [Pf3D7\_0935400] antisense transcript

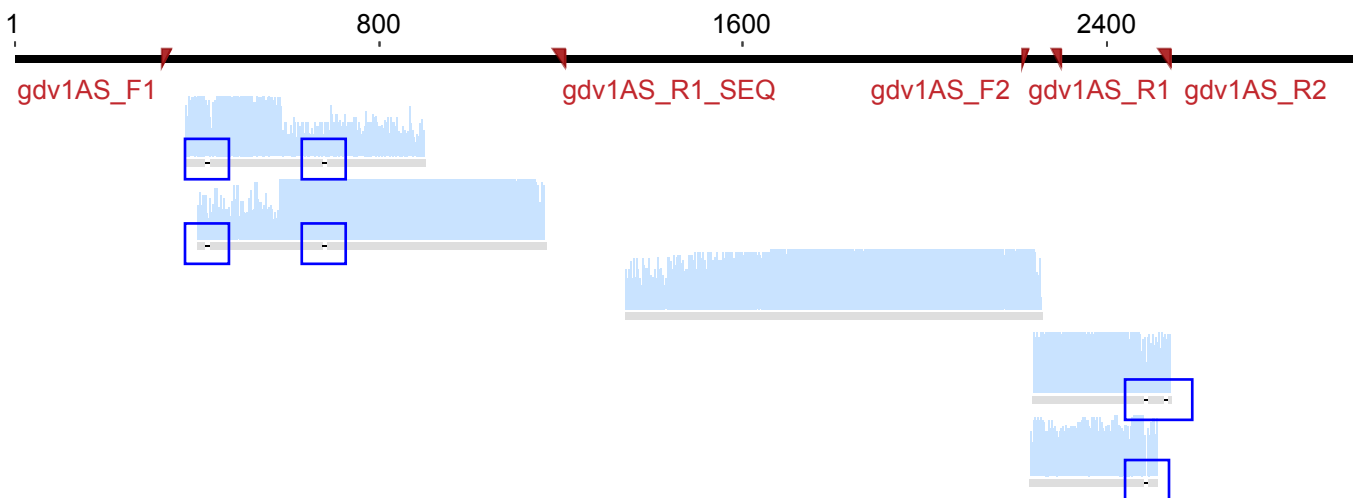

**Figure S26. Experimental confirmation of multi-exonic *P. falciparum* lncRNAs.**

(A)/(B)/(C) PCR primer locations and Sanger sequencing read coverage across amplicons, for multi-exonic lncRNA transcripts predicted antisense to Pf3D7\_0218300, Pf3D7\_0936100, and Pf3D7\_0935400, respectively. Blue boxes highlight predicted splice junctions validated by Sanger sequencing.
