# Supplementary material for: Strand-specific RNA sequencing in Plasmodium falciparum malaria identifies developmentally regulated long non-coding RNA and circular RNA
Source: PubMed Central journal article supplement (PMC4465157; doi:10.1186/s12864-015-1603-4), 2015-06-13
Supplement: 12864_2015_1603_MOESM38_ESM.pdf [file 12864_2015_1603_MOESM38_ESM.pdf]

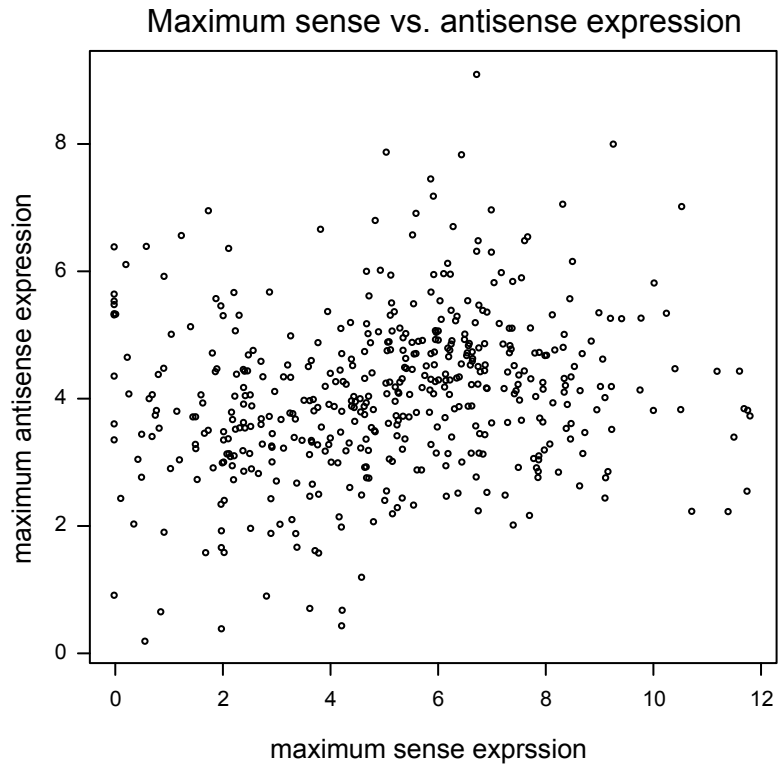

**Figure S38. Maximum antisense expression level does not strongly correlate with maximum sense expression level.** Each point represents a bidirectionally transcribed (sense and antisense) gene. We compared maximum sense and antisense transcript levels during the 56-hour time course. Expression is plotted in units of  $\log_2(\text{FPKM}+1)$ .
