# Supplementary material for: Strand-specific RNA sequencing in Plasmodium falciparum malaria identifies developmentally regulated long non-coding RNA and circular RNA
Source: PubMed Central journal article supplement (PMC4465157; doi:10.1186/s12864-015-1603-4), 2015-06-13
Supplement: 12864_2015_1603_MOESM39_ESM.pdf [file 12864_2015_1603_MOESM39_ESM.pdf]

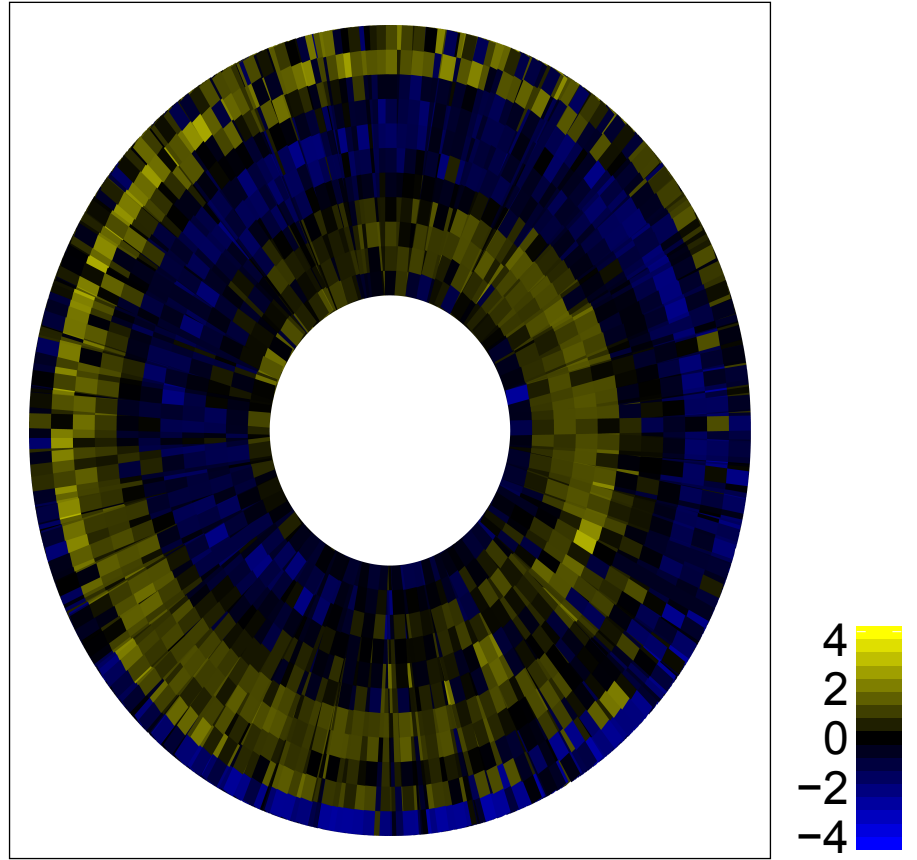

**Figure S39. Periodicity is evident in *P. falciparum* blood stage expression profiles.** For differentially expressed annotated mRNA genes, we visualized mean-centered expression profiles across the 56-hour time course in a circular, non-clustering heatmap. Genes are ordered by their angular position in the MDS plot of gene expression profiles and samples are ordered by time. Expression is in units of  $\log_2(\text{FPKM}+1)$ .
